# Supplementary material for: ecRESCUE: a novel ecDHFR-regulated RESCUE system with reduced RNA off-targeting activity
Source: PubMed Central journal article supplement (PMC8325194; doi:10.1186/s12964-021-00759-2), 2021-07-31
Supplement: 12964_2021_759_MOESM2_ESM.pdf [file 12964_2021_759_MOESM2_ESM.pdf]

## 1. Supplemental Figures

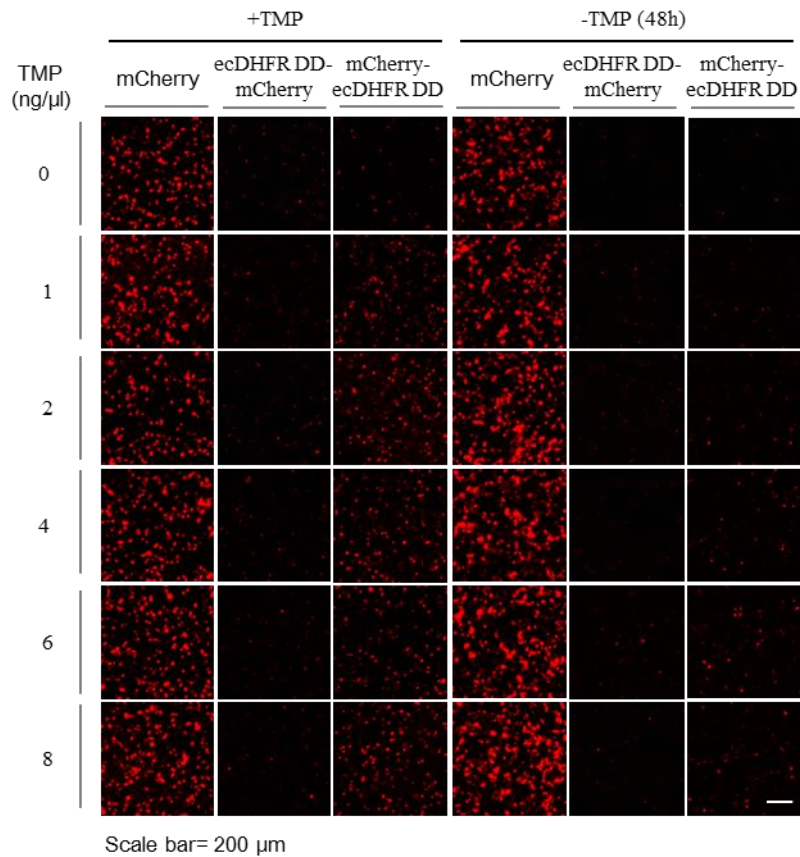

**Figure S1** TMP induced ecDHFR DD-regulated mCherry protein expression.

At 24 h post-transfection, 0, 2, 4, 6 and 8 ng/μL TMP was added into mCherry, ecDHFR DD-mCherry and mCherry-ecDHFR DD expressed 293T cells to induce the ecDHFR DD fused mCherry protein expression. +TMP: at 24 h post TMP treatment; -TMP (48h): at 48 h post TMP removing. Scales bars, 200 μm.

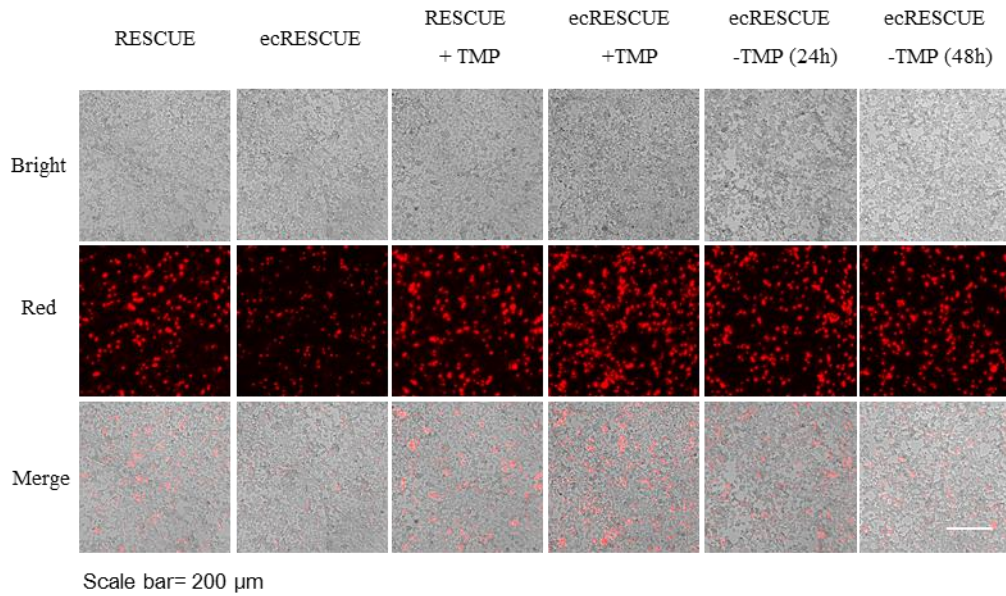

**Figure S2** Detection of expression of TMP-induced ecDHFR DD fused RESCUE-mCherry protein.

At 24 h post-transfection, 2 ng/ $\mu$ L TMP was added into RESCUE and ecRESCUE expressed 293T cells to induce ecDHFR DD fused protein expression. Scales bars, 200  $\mu$ m.

## 2. Table S1 Guide sequences used for endogenous gene editing.

| Targeted gene | Motif | Base flip/position | Spacer sequence                |
|---------------|-------|--------------------|--------------------------------|
| <i>AH11</i>   | GAU   | A/24               | TATGAAAGAAACTACAAGTGATGATCCCGA |
| <i>AH11</i>   | GCU   | C/22               | CAAGTGATGATGTAAGTGCTGCTAACACTA |
| <i>ALDOB</i>  | GAU   | A/22               | AAACCACCATTCAAGGGCTTGATGGCCTCT |
| <i>ALDOB</i>  | GCU   | C/23               | GATGGCCTCTCAGAGCGCTGTGCTCAGTAC |
| <i>APC</i>    | UAA   | A/22               | GAGCTTAACTTAGATAGCAGTAATTTCCCT |
| <i>APC</i>    | UCC   | C/24               | AGTAAAACTGCGGTCAAAAATGTCCCTCCG |

|               |     |      |                                 |
|---------------|-----|------|---------------------------------|
| <i>BMP2</i>   | GAU | A/19 | CTTTTCTTTGCCCTCCTGATTCTTGGCTGG  |
| <i>BMP2</i>   | UCG | C/21 | TGGCCCAGGGATGACTTCCTCGCTGCAGCG  |
| <i>COL3A1</i> | UAU | A/24 | CTGGGAGAAATGGTGACCCTGGTATTCCAG  |
| <i>COL3A1</i> | UCG | C/22 | TGGAGTAGCAGTAGGAGGACTCGCAGGCTA  |
| <i>DMD</i>    | UAU | A/23 | CAACGTCCCTCTCTGCGTGGATATGTGTCT  |
| <i>DMD</i>    | GCU | C/22 | GATATGTGTCTGAACTGGCTGCTGAATGTT  |
| <i>IL2RG</i>  | GAU | A/24 | TGCTAAAACTGCAGAATCTGGTGATCCCCT  |
| <i>IL2RG</i>  | GCA | C/21 | ACTGTTTGGAGCACTTGGTGCAGTACCGGA  |
| <i>MSH6</i>   | UAG | A/21 | CACATATATCCAAGTATGATAGAGTGGTGA  |
| <i>MSH6</i>   | UCU | C/20 | GAGTGGTGAGGAGGGAGATCTGTAGGATCA  |
| <i>PRKN</i>   | UAC | A/22 | GTCCAGCAGGTAGATCAATCTACAACAGCT  |
| <i>PRKN</i>   | UCU | C/21 | CTGTGGGGCTGGCTGTCATTCTGCACACTG  |
| <i>SCN9A</i>  | UAU | A/23 | CAATGCCACACCTGCTTTATATATGCTTTC  |
| <i>SCN9A</i>  | UCU | C/24 | TTTCAGTCCTCTAAGAAGAATATCTATTAA  |
| <i>SH3TC2</i> | UAC | A/23 | TCCACCTACCTTAATTTAGGCTACGTATCC  |
| <i>SH3TC2</i> | UCU | C/21 | ATGTGTCTAGAACATCTCCTCTTTGACCAC  |
| <i>TARDBP</i> | UAG | A/23 | TAATGTCACAGCGACATATGATAGATGGAC  |
| <i>TARDBP</i> | UCU | C/23 | TATGGTGCAGGTCAAGAAAGATCTTAAGAC  |
| <i>UBE3A</i>  | UAU | A/25 | GCTTCCTGTCCAACCTTTTCTTCGTATGGAT |
| <i>UBE3A</i>  | UCU | C/24 | CTTTATAAGATTAATGCAAAACTCTGTGAT  |
| <i>KRAS</i>   | UAU | A/25 | TTCAGAATCATTTTGTGGACGAATATGATC  |
| <i>KRAS</i>   | ACG | C/20 | TTCAGAATCATTTTGTGGACGAATATGATC  |

|              |     |      |                                |
|--------------|-----|------|--------------------------------|
| <i>NFKB1</i> | UAU | A/13 | TAATCCAGAAGTATTTCAACCACAGATGGC |
| <i>NFKB1</i> | UCA | C/17 | TAATCCAGAAGTATTTCAACCACAGATGGC |
| <i>NRAS</i>  | UAU | A/26 | GGACAGGCGAAGGCTTCCTCTGTGTATTTG |

### 3. Primers used in this study.

**Table S2.** Primer sequences used for PCR fragments amplification.

| Targeted gene | PCR primer sequences (5'-3')                       |
|---------------|----------------------------------------------------|
| <i>AH11</i>   | F: GCTGAGAGATGCCTACAGCT; R: CTGGCTGTGGCTTTGTATGT   |
| <i>ALDOB</i>  | F: GCCGGCAGTTCCGAGAAATC; R: GTAGACAGCAGCCAGGACCT   |
| <i>APC</i>    | F: GCAAGTTGAGGCACTGAAGA; R: CAGCAAGAAGCAATGACCTC   |
| <i>BMPR2</i>  | F: GGAATTTCTGCAGCGGCATG; R: GCCATAGCAGGTGCTACCTT   |
| <i>COL3A1</i> | F: CTCAGGATCCGTTCTCTGCG; R: TCCTGGAGGGCCTGAAGGAC   |
| <i>DMD</i>    | F: CTCCGAAGACTGCAGAAGGC; R: TACTGCCCCCAAAGGATGCA   |
| <i>IL2RG</i>  | F: AGCCTACCAACCTCACTCTG; R: TTCACTCCAATGCTGAGCAC   |
| <i>MSH6</i>   | F: AGCTGTACCACATGGATGCT; R: GGGGGATAGTGTGCCACTAG   |
| <i>PRKN</i>   | F: GTGACCTGGATCAGCAGAGC; R: CACTAGTCCCAGGGCAGTGT   |
| <i>SCN9A</i>  | F: CCCCAAAGCCAAGCAGTGAC; R: CAGTTCCACGGGTCACGAAG   |
| <i>SH3TC2</i> | F: ACCCCTACAGGAAGCTGCTC; R: TCCAACCTCGGAGCCAGCTTC  |
| <i>TARDBP</i> | F: ATGCTGGCTGGGGAAATCTG; R: CAAAGGCCCTGAATGGCTTG   |
| <i>UBE3A</i>  | F: GGCACGACAGATCAGGAGA; R: CTTTCCGGAAGCTCTGTACC    |
| <i>KRAS</i>   | F: GGCTCGGCCAGTACTCCCGG; R: GTCCTCATGTACTGGTCCCTCA |
| <i>NFKB1</i>  | F: TTAGGAGGGAGAGCCCACCC; R: AGTGCAGATCCCATCCTCAC   |

**Table S3.** Primer sequences used for dCas13b, ADAR2 and mCherry mRNA expression detection by RT-PCR.

| Targeted gene | PCR primer sequences (5'-3')                     |
|---------------|--------------------------------------------------|
| dCas13b       | F: GCACTACGAGTATTGGCAGC; R: GTACAGCCGCAGCTTCTTCT |
| ADAR2         | F: CCTGTGGAGATGCCAGAATC; R: CATTGTTGCGCACTGGAATC |
| mCherry       | F: TCCTGTCCCCTCAGTTCATG; R: GCCGTCTCGAAGTTCATCA  |
| <i>GAPDH</i>  | F: AGAAGGCTGGGGCTCATTG; R: AGGGGCCATCCACAGTCTTC  |

**Table S4. mCherry reporter expression vectors**

ecDHFR DD, and mCherry are highlighted in blue, and red, respectively. The start and stop codons are capitalized.

|                |                                                                                                                                                                                                                                                                                                                                                                                                                                                                                                                                                                                                                                                                                                                                                                                                           |
|----------------|-----------------------------------------------------------------------------------------------------------------------------------------------------------------------------------------------------------------------------------------------------------------------------------------------------------------------------------------------------------------------------------------------------------------------------------------------------------------------------------------------------------------------------------------------------------------------------------------------------------------------------------------------------------------------------------------------------------------------------------------------------------------------------------------------------------|
| <b>mCherry</b> | <p>ATGgtgagcaagggcgaggagataacatggccatcatcaaggagttcatgcgctcaaggtgcacatggag</p> <p>ggctccgtgaacggccacgagttcgagatcgagggcgagggcgagggccgcccctacgagggcaccagac</p> <p>cgccaagctgaaggtgaccaaggggtgccccctgccttcgctgggacatcctgtcccctcagttcatgtacgg</p> <p>ctccaaggcctacgtgaagcaccccgccgacatccccgactactgaagctgtccttccccgagggcttcaagtg</p> <p>ggagcgcgtgatgaactcgaggacggcggcgtggtgaccgtgaccaggactcctccctgcaggacggcga</p> <p>gttcatctacaaggtgaagctgcgcggaccaactcccctccgacggccccgtaatgcagaagaagaccatgg</p> <p>gctgggaggcctcctccgagcggatgtaccccgaggacggcgcctgaagggcgagatcaagcagaggctga</p> <p>agctgaaggacggcggcactacgacgtgaggtcaagaccacctacaaggccaagaagcccgtgcagctgc</p> <p>ccggcgctacaacgtcaacatcaagttggacatcacctcccacaacgaggactacaccatcgtggaacagtac</p> <p>gaacgcgccgagggccgcccactccaccggcggcatggacgagctgtacaagTAA</p> |
|----------------|-----------------------------------------------------------------------------------------------------------------------------------------------------------------------------------------------------------------------------------------------------------------------------------------------------------------------------------------------------------------------------------------------------------------------------------------------------------------------------------------------------------------------------------------------------------------------------------------------------------------------------------------------------------------------------------------------------------------------------------------------------------------------------------------------------------|

|                                      |                                                                                                                                                                                                                                                                                                                                                                                                                                                                                                                                                                                                                                                                                                                                                                                                                                                                                                                                                                                                                                                                                                                                                                                                                                                                                                      |
|--------------------------------------|------------------------------------------------------------------------------------------------------------------------------------------------------------------------------------------------------------------------------------------------------------------------------------------------------------------------------------------------------------------------------------------------------------------------------------------------------------------------------------------------------------------------------------------------------------------------------------------------------------------------------------------------------------------------------------------------------------------------------------------------------------------------------------------------------------------------------------------------------------------------------------------------------------------------------------------------------------------------------------------------------------------------------------------------------------------------------------------------------------------------------------------------------------------------------------------------------------------------------------------------------------------------------------------------------|
| <p><b>mCherry-<br/>ecDHFR DD</b></p> | <p>ATGgtgagcaagggcgaggagataacatggccatcatcaaggagttcatgcgcttcaaggtgcacatggag<br/> ggctccgtgaacggccacgagttcgagatcgaggcgagggcgagggcccccctacgaggcaccagac<br/> cgccaagctgaaggtgaccaaggtggccccctgcccttcgctgggacatcctgtcccctcagttcatgtacgg<br/> ctccaaggcctacgtgaagcaccgccgacatccccgactacttgaagctgtccttccccgagggttcaagtg<br/> ggagcgcgtgatgaacttcgaggacggcggcgtggtgaccgtgaccaggactcctcctgcaggacggcga<br/> gttcatctacaaggtgaagctgcgcggcaccactccccctccgacggccccgtaatgcagaagaagaccatgg<br/> gctgggaggcctcctccgagcggatgtacccgaggacggcgcctgaagggcgagatcaagcagaggctga<br/> agctgaaggacggcggccactacgacgctgaggtcaagaccacctacaagccaagaagcccgctgcagctgc<br/> ccggcgcctacaacgtcaacatcaagttggacatcacctcccacaacgaggactacaccatcgtggaacagtac<br/> gaacgcgcggaggcgccactccaccggcggcatggacgagctgtacaagatcagctctgattcggcggttag<br/> cggtagattacgttatcggcatggaaaacgcatgcccgtggaacctgcctgccgatctcgcttggttaaacgcaa<br/> caccttaataaaccgtgattatggcgccatacctgggaatcaatcggtcgtccgttgcaggacgcaaaaat<br/> attatcctcagcagtcaccgagtacggacgatcgcgtaacgtgggtgaagtcgggtgatgaagccatcgcggc<br/> gtgtggtgacgtaccagaaatcatggtgattggcggcggcgcgttattgaacagttcttccaaaagcgcaaaaa<br/> ctgtatctgacgcatatcgacgcagaagtgaagggcgcacccatttcccggattacgagccgatgactgggaa<br/> tcggtattcagcgaattccacgatgctgatgcgcagaactctcacagctattgctttgagattctggagcggTAA</p> |
| <p><b>ecDHFR<br/>DD-mCherry</b></p>  | <p>ATGatcagctctgattcggcgttagcggtagattacgttatcggcatggaaaacgccatgccgtggaacctgct<br/> gccgatctcgcttggttaaacgcaacaccttaataaaccgtgattatggcgccatacctgggaatcaatg<br/> gtcgtccgttgcaggacgcaaaaatattatcctcagcagtcaccgagtacggacgatcgcgtaacgtgggtga<br/> agtcgggtgatgaagccatcgcgcgctggtgacgtaccagaaatcatggtgattggcggcggcgcgttattg<br/> aacagttcttccaaaagcgcaaaaactgtatctgacgcatatcgacgcagaagtgaagggcgcacccatttcc<br/> cggattacgagccgatgactgggaatcggattcagcgaattccacgatgctgatgcgcagaactctcacagcta</p>                                                                                                                                                                                                                                                                                                                                                                                                                                                                                                                                                                                                                                                                                                                                                                                                            |

|  |                                                                                                                                                                                                                                                                                                                                                                                                                                                                                                                                                                                                                                                                                                                                                                                                     |
|--|-----------------------------------------------------------------------------------------------------------------------------------------------------------------------------------------------------------------------------------------------------------------------------------------------------------------------------------------------------------------------------------------------------------------------------------------------------------------------------------------------------------------------------------------------------------------------------------------------------------------------------------------------------------------------------------------------------------------------------------------------------------------------------------------------------|
|  | <p>ttgctttgagattctggagcgggtgagcaaggcgaggaggataacatggccatcatcaaggagttcatgccttc<br/> aaggtgcacatggaggctccgtgaacggccacgagttcgagatcagggcgagggcgagggccgccctac<br/> gagggcaccagaccgccaagctgaaggtgaccaagggtggccccctgcccttcgctgggacatcctgtccc<br/> ctcagttcatgtacggctccaaggcctacgtgaagcaccgccgacatccccgactactgaagctgtccttccc<br/> cgagggcttcaagtgggagcgcgtgatgaacttcgaggacggcggcgtggtgaccgtgaccaggactcctcc<br/> ctgcaggacggcgagttcatctacaagggtgaagctgcgcggcaccaactcccctccgacggccccgtaatgca<br/> gaagaagaccatgggctgggagcctcctccgagcggatgtaccccaggacggcgcctgaaggcgagat<br/> caagcagaggctgaagctgaaggacggcgccactacgacgctgaggtcaagaccactacaaggccaagaa<br/> gcccgtgcagctgcccggcgctacaacgtcaacatcaagttggacatcacctcccacaacgaggactacacca<br/> tcgtggaacagtacgaacgcgccgagggccccactccaccggcgcatggacgagctgtacaagTAA</p> |
|--|-----------------------------------------------------------------------------------------------------------------------------------------------------------------------------------------------------------------------------------------------------------------------------------------------------------------------------------------------------------------------------------------------------------------------------------------------------------------------------------------------------------------------------------------------------------------------------------------------------------------------------------------------------------------------------------------------------------------------------------------------------------------------------------------------------|

**Table S5. RNA base editor expression vectors**

ecDHFR DD, dCas13, ADAR2 and mCherry are highlighted in blue, yellow, green and red, respectively. The start and stop codons are capitalized.

|               |                                                                                                                                                                                                                                                                                                                                                                                                                                                                                                                                                                                                                                                        |
|---------------|--------------------------------------------------------------------------------------------------------------------------------------------------------------------------------------------------------------------------------------------------------------------------------------------------------------------------------------------------------------------------------------------------------------------------------------------------------------------------------------------------------------------------------------------------------------------------------------------------------------------------------------------------------|
| <b>RESCUE</b> | <p>ATGgagaagcccctgctgcctaactgtataccctgaagcacaagttctttggggcgccttctgaatatgcc<br/> cggcacaacgcctttatcaccatctgccacatcaatgagcagctgggcctgaaaacccccagcaacgacgataa<br/> gatcgtggacgtggtgtgcgagacatggaacaatacctgaacaatgaccacgatctgtgaagaagtcccagct<br/> gaccgagctgatcctgaagcacttccctttctgacagccatgtgctaccacccccctaagaaggagggaagaa<br/> gaagggccaccagaaggagcagcagaaggagaaggagagcgaggcacagtcccaggcagaggccctgaac<br/> ccatccaagctgatcgaggccctggagatcctggtgaatcagctgcactctctgGCAaactactatageGCCt<br/> ataagcacaagaagcccgacgccgagaaggatatctcaagcactgtataaggccttcgacgcctctctgagaa<br/> tggtgaaggaggattataaggcccacttaccgtgaatctgacaagggaactttgccacctgaaccgcaagggca</p> |
|---------------|--------------------------------------------------------------------------------------------------------------------------------------------------------------------------------------------------------------------------------------------------------------------------------------------------------------------------------------------------------------------------------------------------------------------------------------------------------------------------------------------------------------------------------------------------------------------------------------------------------------------------------------------------------|

agaacaagcaggacaatcccgaactcaacagatacagattcgagaaggatggcttctttaccgagcttggcctgct  
gttctttacaatctgtttctggacaagaggatgcctattggatgctgaagaagggtccggcttcaaggcctctca  
caagcagcgcgagaagatgaccacagaggtgtttgcaggagccgcacctctgctgccaagctgaggtggagt  
cccgctacgaccacaaccagatgctgctggatgctgctgagctgagcagatgtcctaagctgctgtatgagaa  
gctgagcggaggagaataagaagcacttccaggtggaggccgacggcttctggatgagatcaggaggagcag  
aaccattcaaggacaccctgatccggcaccagatagattccctactttgcctgaggtatctggacctgaatga  
gtccttcaagtctatccgcttccaggtggatctgggcacataccactattgtatctacgacaagaagatcggcgatga  
gcaggagaagaggcacctgaccgcacactgctgtccttcggccggctgcaggactttaccgagatcaacagac  
cccaggagtggaggccctgaccaaggacctggattacaaggagacatccaatcagcctttcatctetaagacca  
caccacactatcacatcaccgacaacaagatcggcttccggctgggcacaagaaggagctgtaccctccctgg  
agatcaaggatggcgccaatagaatcgccaagtacccttataactccggcttctggtgccacgcctttatctctgtg  
cacgagctgctgcctctgatgttctaccagcacctgaccggcaagagcggagacctgctgaaggagacagtgcg  
gcacatccagagaatctataaggacttcgaggaggagcggatcaataccatcaggatctggagaaggcaaac  
agggcagactgccactgggagccttcccaagcagatgctgggcctgctgcagaataagcagcctgatctgtccg  
agaaggccaagatcaagatcgagaagctgatcggcagacaaagctgctgtctcacaggctgaacacaaagct  
gaagagctccccaaagctgggcaagcggagagagaagctgatcaagacaggcgtgctggccgactggctggt  
gaaggatttcatgcgcttccagcccgtggcctacgacgccagaatcagcctatcaagtctagcaaggccaactcc  
accgagttctggttatcaggcgcgccctggccctgtacggaggagagaagaataggctggagggtatttcaag  
cagaccaacctgatcggcaacacaaatccacacccttctgaacaagttaattggaaggcctgcaggaatctgg  
tggatttctaccagcagtatctggagcagcgcgagaagtttctggaggccatcaagaaccagccatgggagccct  
accagfattgcctgctgctgaagatccctaaggagaacaggaagaatctggtgaagggatgggagcagggagg  
aatctctctgccacggggcctgtttaccgaggccatcagagagacactgtctgaggacctgatgctgagcaagcc



aatccgcaaggagatcaagaagcacggccgggtgggcttcatcagcagagccatcacctgtactttaaggaga  
agtatcaggataagcaccagagcttctacaatctgtcctataagctggaggcaaaggcaccactgctgaagcggg  
aggagcactacgagtattggcagcagaacaagcctcagctccaaccgagagccagagctggagctgcacac  
aagcgaccgctggaaggattacctgctgtataagagatggcagcacctggagaagaagctcggctgtaccgga  
atcaggacgtgatgctgtggctgatgacctggagctgacaaagaaccactcaaggagctgaacctgaattatca  
ccagctgaagctggagaatctggccgtgaactgcaggaggccgatccaagctgaaccctctgaatcagacc  
tgccatggtgctgctgtgaaggtgtaccctgccacagccttggcaggtgcagtaccacaagacccaatca  
ggacagtgtatatccgcgaggagcacaccaaggccctgaagatgggcaactcaaggccctggtgaaggaccg  
gagactgaatggcctgttctttatcaaggaggagaacgatacacagaagcaccaatcagccagctcggct  
gaggcgcgagctggagatctaccagtctctgagagtggacgcctcaaggagacactgagcctggaggagaag  
ctgctgaataagcacacatcctctcctctctggagaacgagtttagggccctgctggaggagtgaagaaggag  
tatgccgccagctccatggtgacagacgagcacatgccttcacgccagcgtgGCcaatgcctctgcGCca  
accagtacccttctacaaggaggccctgcagcccctatcccactgtcaccgtgGCCagcccaccacagag  
gagaaggatggcctgggaatcgcagaggccctgctgaaggtgctgaggagactgtgagatcgtgaagtccc  
agatcggatccctcaactgctccactgaaagactgacactgggatcccagctgcattaccgaggttttagctg  
acgctgtctcacgctggtcatagtaagtttggtagctgaccgacaacttctcctcccctcacgctcgagaata  
ggtctggctggagctgcatgacaacaggcacagatgftaaagatccaaggatgatgtgttttacaggagcaa  
aatgtattaatggtgaatacctaagtatcgtggccttcattaaatgactgcatgcagaaatagtatctcggagatc  
ctgctcagatttcttatacacaactgagcttacttaataacgaggatgatcaaaaaagatccatctttcagaatc  
agagcgaggggggttaggctgaaggagaatatacagtttcatctgtacatcagcacctcctcctgtggagatgcc  
agaatcttctaccacatgaggcaatcctggaagaaccagcagatagacacccaaatcgtaaagcaaggagaca  
gctacggacaaaatagaggctggtcaggggacgattccagtgcgcaaatgcgagcatccaaacgtgggac

|                 |                                                                                                                                                                                                                                                                                                                                                                                                                                                                                                                                                                                                                                                                                                                                                                                                                                                                                                                                                                                                                                                                                                                                                                                                                                                                                                                                                                                                                                                       |
|-----------------|-------------------------------------------------------------------------------------------------------------------------------------------------------------------------------------------------------------------------------------------------------------------------------------------------------------------------------------------------------------------------------------------------------------------------------------------------------------------------------------------------------------------------------------------------------------------------------------------------------------------------------------------------------------------------------------------------------------------------------------------------------------------------------------------------------------------------------------------------------------------------------------------------------------------------------------------------------------------------------------------------------------------------------------------------------------------------------------------------------------------------------------------------------------------------------------------------------------------------------------------------------------------------------------------------------------------------------------------------------------------------------------------------------------------------------------------------------|
|                 | <p>ggggtgctgcaaggggagcggctgctcaccatgtcctgcagtgacaagattgcacgctggaacgtggtgggcat<br/> ccaggatcactgctcagcatttctggagcccatttctctcagcatcatcctgggcagccttaccacgggg<br/> accacettccaggccatgtaccagcggatctccaacatagaggacctgccacctctacacctcaacaagcc<br/> tttctcacaggcatcagcaatgcagaagcacggcagccagggaaggccccatattcagtgtcaactggacgg<br/> taggcgactccgctattgaggtcatcaaccacgactgggaaggagagctgggccgcgctcccgcctgtgt<br/> aagcacgcgttactgtcgtggatgcgtgtgcacggcaaggtccctcccacttactacgtccaagattacaa<br/> gccaacgtgtaccatgagacaaaagctggcggcaaaggagtaccaggcccaaggcgcgtctgttcacagcc<br/> ttcatcaaggcgggctggggcctgggtggagaagcccaccgagcaggaccagttctactcacgcttcaact<br/> gcctccactgaaagactgacactggtgagcaaggcggaggaggataacatggccatcatcaaggagtcatgc<br/> gctcaagggtcacatggagggtccgtgaacggccacgagttcgagatcgaggcggaggcgaggggccgc<br/> cctacgagggcacccagaccgccaagctgaaggtagcaagggtggccccctgcccttgcctgggacatcct<br/> gtcccctcagttcatgtacggctccaagcctacgtgaagcaccgccgacatccccgactactgaagetgtcc<br/> ttccccgagggttcaagtgggagcgcgtgatgaactcgaggacggcggcgtggtgacctgacctgaccagactc<br/> ctccctgcaggacggcagttcatctacaaggtgaagctgcgcggcaccactccccctccagcggccccgtaat<br/> gcagaagaagaccatgggctgggaggcctcctccgagcggatgtaccccgaggacggcgcctgaagggcg<br/> agatcaagcagaggctgaagctgaaggacggcggccactacgacgtgaggtcaagaccacctacaaggcca<br/> agaagcccgtgcagctgcccggcctacaacgtcaacatcaagttggacatcacctcccacaacgaggactac<br/> accatcgtggaacgttacgaacgcgccgaggccactccaccggcggcatggacgagctgtacaagTA<br/> A</p> |
| <b>ecRESCUE</b> | <p>ATGgagaagcccctgctgcctaactgtataccctgaagcacaagttctttggggcgccttctgaaatcgcce<br/> cggcacaacgcctttaccatctgccacatcaatgagcagctgggcctgaaaacccccagcaacgacgataa<br/> gatcgtggacgtggtgtgcgagacatggaacaatatcctgaacaatgaccacgatctgtgaagaagtcccagct</p>                                                                                                                                                                                                                                                                                                                                                                                                                                                                                                                                                                                                                                                                                                                                                                                                                                                                                                                                                                                                                                                                                                                                                                                                          |

gaccgagctgatcctgaagcacttccctttctgacagccatgtgctaccacccccctaagaaggaggccaagaa  
gaagggccaccagaaggagcagcagaaggagaaggagagcaggcacagtcccaggcagaggccctgaac  
ccatccaagctgatcgaggccctggagatcctggtaatcagctgcactctctgGCAaactactatageGCCt  
ataagcacaagaagcccgacgccgagaaggatatctcaagcacctgtataaggccttcgacgcctctctgagaa  
tggtaaggaggattataaggcccacttcaccgtgaatctgacaagggactttgccacctgaaccgcaaggga  
agaacaagcaggacaatcccgactcaacagatacagattcgagaaggatggcttctttaccgagcttggcctgct  
gttctttacaatctgtttctggacaagaggatgcctattggatgctgaagaagggtccggcttcaaggcctctca  
caagcagcgcgagaagatgaccacagagggttttcaggagccgcatcctgctgccaagctgaggctggagt  
cccgtacgaccacaaccagatgctgctggatatgctgctgagctgagcagatgtcctaagctgctgtatgagaa  
gctgagcaggagaataagaagcacttccaggtggaggccgacggctttctggatgagatcgaggaggagcag  
aaccattcaaggacaccctgatccggcaccaggatagattccctactttgccctgaggatctggacctgaatga  
gtccttcaagtctatccgcttccaggtggatctgggcacataccactattgtatctacgacaagaagatcggcgatga  
gcaggagaagaggcacctgaccgcacactgctgtccttcggccggtgcaggactttaccgagatcaacagac  
cccaggagtggaaaggccctgaccaaggacctggattacaaggagacatccaatcagcctttcatctetaagacca  
caccacactatcacataccgacaacaagatcggcttccgctgggcacaagaaggagctgtaccctccctgg  
agatcaaggatggcgccaatagaatcgccaagtacccttataactccggcttctgtggccacgcctttatctctgtg  
cacgagctgctgcctctgatgttctaccagcacctgaccggcaagagcaggacctgctgaaggagacagtgcg  
gcacatccagagaatctataaggacttcgaggaggagcggatcaataccatcgaggatctggagaaggcaaac  
agggcagactgccactgggagcctttccaagcagatgctggcctgctgcagaataagcagcctgatctgtccg  
agaaggccaagatcaagatcgagaagctgatcggcagacaaagctgctgtctcacaggctgaacacaaagct  
gaagagctccccaaagctgggcaagcggagagagaagctgatcaagacaggcgtgctggccgactggctggt  
gaaggatttcatgcgttccagcccgtggcctacgacgccagaatcagcctatcaagtctagcaaggccaactcc

accgagttctggtttatcaggcgcgccctggccctgtacggaggagagaagaataggctggagggctatttcaag  
cagaccaacctgatcggcaacacaaatccacacccttctgaacaagttaattggaaggctgcaggaatctgg  
tgatttctaccagcagtatctggagcagcgcgagaagtttctggaggccatcaagaaccagccatgggagccct  
accagtattgcctgctgctgaagatccctaaggagaacaggaagaatctggtgaagggatgggagcagggagg  
aatctctctgccacggggcctgtttaccgaggccatcagagagactgtctgaggacctgatgctgagcaagcc  
aatccgcaaggagatcaagaagcacggccgggtgggttcatcagcagagccatcacctgtactttaaggaga  
agtatcaggataagcaccagagcttctacaatctgtcctataagctggaggcaaaggcaccactgctgaagcggg  
aggagcactacgagtattggcagcagaacaagcctcagtctccaaccgagagccagaggctggagctgcacac  
aagcgaccgctggaaggattacctgctgtataagagatggcagcacctggagaagaagctgcggctgtaccgga  
atcaggacgtgatgctgtggctgatgaccctggagctgacaaagaaccactcaaggagctgaacctgaattatca  
ccagctgaagctggagaatctggccgtgaacgtgcaggaggccgatccaagctgaaccctctgaatcagacc  
tgccatggtgctgctgtgaaggtgtaccctgccacagccttggcgaggtgcagtaccacaagaccccaatca  
ggacagtgtatatccgcgaggagcacaccaaggccctgaagatgggcaactcaaggccctggtgaaggaccg  
gagactgaatggcctgttctctttatcaaggaggagaacgatacacagaagcacccaatcagccagctgcggct  
gaggcgcgagctggagatctaccagtctctgagagtggacgcctcaaggagacactgagcctggaggagaag  
ctgctgaataagcacacatccctgtcctctctggagaacgagtttagggccctgctggaggagtgaagaaggag  
tatgccccagctccatggtgacagacgagcacatcgccttcacgccagcgtgGCcaatgccttctgcGCca  
accagtacccttctacaaggaggccctgcacgccctatcccactgttcaccgtggcccagcccaccacagag  
gagaaggatggcctgggaatcgcagaggccctgctgaaggtgctgaggagactgtgagatcgtgaagtccc  
agatcggatccctcaactgctccactgaaagactgacactgggatcccagctgcatttaccgagttttagctg  
acgctgtctcacgctggtcataggttaagtttgggtgacctgaccgacaacttctcctcccctcagctcgcagaata  
ggtctggctggagctgcatgacaacaggcacagatgttaaagatccaaggtgatgtgtttctacaggagcaa

aatgtattaatggtgaatacctaagtgatcgtggccttgcattaaatgactgccatgcagaaatagtatctcggagatc  
ctfgctcagattctttatacacaacttgagctttacttaataacgaggatgatcaaaaaagatccatcttcagaaatc  
agagcgaggggggttaggctgaaggagaatatacagttcatctgtacatcagcacctctccctgtggagatgcc  
agaatcttctcaccacatgaggcaatcctggaagaaccagcagatagacacccaaatcgtaaagcaagaggaca  
gctacggacaaaafagaggctggtcaggggacgattccagtgcgcaaatgcgagcatccaaacgtgggac  
ggggtgctgcaaggggagcggctgctccatgtcctgcagtgacaagattgcacgctggaacgtggtgggcat  
ccagggatcactgctcagcatttctggagcccatttctcagcagatcatcctgggcagccttaccacgggg  
accacettccaggccatgtaccagcggatctccaacatagaggactgccacctctacacctcaacaagcc  
tttgctcacagcatcagcaatgcagaagcacggcagccagggaagccccatattcagtgtaactggacgg  
taggcgactccgctattgaggtcatcaacgccacgactgggaaggagagctgggccgcgctcccgcctgtgt  
aagcacgcgtgtactgtcgtggatgcgtgtgcacggcaaggtccctcccacttactacgtccaagattacaa  
gccaacgtgtaccatgagacaaaagctggcggcaaggagtaccaggcccaaggcgcgtctgttcacagcc  
ttcatcaaggcggggctggggcctgggtggagaagcccaccgagcaggaccagttctcactcacgcttcaact  
gcctccactgaaagactgacactggtgagcaaggcggaggaggataaacatggccatcatcaaggagtcatgc  
gcttcaagggtcacatggagggtccgtgaacggccacgagttcagatcagggcgaggcgaggggccgc  
cctacagggcaccagaccgccaagctgaaggtgaccaagggtggccccctgccctcgcctgggacatcct  
gtcccctcagttcatgtacggctccaaggcctacgtgaagcaccgcgacatccccgactactgaagctgtcc  
ttccccgagggttcaagtgggagcgcgtgatgaactcgaggacggcggcgtggtgaccgtgaccagggactc  
ctccctgcaggacggcgagttcatctacaaggtgaagctgcgcggcaccactccctccgacggccccgtaat  
gcagaagaagacatgggctgggaggcctcctccgagcggatgtaccccaggacggcgcctgaaggcg  
agatcaagcagaggctgaagctgaaggacggcggccactacgacgtgaggtcaagaccacctacaaggcca  
agaagcccgtgcagctgccccggcctacaacgtcaacatcaagttggacatcacctcccacaacgaggactac

accatcgtggaacagtacgaacgcgccgaggccgcccactccaccggcgcatggacgagctgtacaagatc  
agtctgattcggcggttagcggtagattacggtatcggcatggaaaacccatgccgtggaacctgcctgccgatc  
tcgctggtttaaacgaacaccttaataaaccegtgattatggccgccatacctgggaatcaatcggtcgtccg  
ttgccaggacgcaaaaatattatcctcagcagtcaccgagtagcggacgatcgcgtaacctgggtgaagtcggtg  
gatgaagccatcggcgctgtggtgacgtaccagaaatcatggtgattggcggcggtcgcgttattgaacagttct  
tgccaaaagcgcaaaaactgtatctgacgcatacgcagcagaagtgaaggcgacacccattcccggattacg  
agccggatgactgggaatcggattcagcgaattccacgatgctgatgcgagaactctcacagctattgctttgag  
attctggagcggTAA
